# Supplementary material for: Utilization of Women’s Preventive Health Services During the COVID-19 Pandemic
Source: PubMed Central journal article supplement (PMC8796922; doi:10.1001/jamahealthforum.2021.1408), 2021-07-02
Supplement: jamahealthforum-e211408-s001.pdf [file jamahealthforum-e211408-s001.pdf]

## Supplemental Online Content

Becker NV, Moniz MH, Tipirneni R, Dalton VK, Ayanian JZ. Utilization of women's preventive health services during the COVID-19 pandemic. *JAMA Health Forum*. 2021;2(7):e211408. doi:10.1001/jamahealthforum.2021.1408

**eAppendix 1.** Diagnostic, procedural, and drug codes used to identify health services

**eAppendix 2.** Adjusted odds ratios of utilization of women's preventive health services in July 2020 to December 2020 compared with July 2019 to December 2019

This supplemental material has been provided by the authors to give readers additional information about their work.

**eAppendix 1.** Diagnostic, procedural, and drug codes used to identify health services

| <b>Preventive service</b> | <b>Type of Code</b> | <b>Code</b> | <b>Description</b>                                                                                                                                                                                                            |
|---------------------------|---------------------|-------------|-------------------------------------------------------------------------------------------------------------------------------------------------------------------------------------------------------------------------------|
| breast cancer screening   | ICD-10-CM           | Z1231       | Encounter for screening mammogram for malignant neoplasm of breast                                                                                                                                                            |
| breast cancer screening   | CPT                 | 77067       | Screening mammography, bilateral (2-view study of each breast), including computer-aided detection (CAD) when performed                                                                                                       |
| breast cancer screening   | CPT                 | 77063       | Screening digital breast tomosynthesis, bilateral                                                                                                                                                                             |
| cervical cancer screening | ICD-10-CM           | Z124        | Screening for malignant neoplasms of the cervix (routine cervical pap smear)                                                                                                                                                  |
| cervical cancer screening | ICD-10-CM           | Z1151       | Special screening examination for human papillomavirus (HPV)                                                                                                                                                                  |
| cervical cancer screening | HCPCS               | Q0091       | Screening papanicolaou smear; obtaining, preparing and conveyance of cervical or vaginal smear to laboratory                                                                                                                  |
| cervical cancer screening | HCPCS               | G0123       | Screening cytopathology, cervical or vaginal (any reporting system), collected in preservative fluid, automated thin layer preparation, screening by cytotechnologist under physician supervision                             |
| cervical cancer screening | HCPCS               | G0124       | Screening cytopathology, cervical or vaginal (any reporting system), collected in preservative fluid, automated thin layer preparation, requiring interpretation by physician                                                 |
| cervical cancer screening | HCPCS               | G0143       | Screening cytopathology, cervical or vaginal (any reporting system), collected in preservative fluid, automated thin layer preparation, with manual screening and rescreening by cytotechnologist under physician supervision |
| cervical cancer screening | HCPCS               | G0144       | Screening cytopathology, cervical or vaginal (any reporting system), collected in preservative fluid, automated thin layer preparation, with screening by automated system, under physician supervision                       |
| cervical cancer screening | HCPCS               | G0145       | Screening cytopathology, cervical or vaginal (any reporting system), collected in preservative fluid, automated thin layer preparation, with screening by automated system and manual rescreening under physician supervision |
| cervical cancer screening | HCPCS               | G0147       | Screening cytopathology smears, cervical or vaginal, performed by automated system under physician supervision                                                                                                                |
| cervical cancer screening | HCPCS               | G0141       | Screening cytopathology smears, cervical or vaginal, performed by automated system, with manual rescreening, requiring interpretation by physician                                                                            |
| cervical cancer screening | HCPCS               | G0148       | Screening cytopathology smears, cervical or vaginal, performed by automated system with manual rescreening                                                                                                                    |
| cervical cancer screening | HCPCS               | P3000       | Screening papanicolaou smear, cervical or vaginal, up to three smears, by technician under physician supervision                                                                                                              |
| cervical cancer screening | HCPCS               | P3001       | Screening papanicolaou smear, cervical or vaginal, up to three smears, requiring interpretation by physician                                                                                                                  |
| cervical cancer screening | CPT                 | 88141       | Cytopathology, cervical or vaginal (any reporting system), requiring interpretation by physician                                                                                                                              |
| cervical cancer screening | CPT                 | 88142       | Cytopathology, cervical or vaginal (any reporting system), collected in preservative fluid, automated thin layer preparation; manual screening under physician supervision                                                    |
| cervical cancer screening | CPT                 | 88143       | Cytopathology, cervical or vaginal (any reporting system), collected in preservative fluid, automated thin layer preparation; with manual screening and rescreening under physician supervision                               |
| cervical cancer screening | CPT                 | 88147       | Cytopathology smears, cervical or vaginal; screening by automated system under physician supervision                                                                                                                          |
| cervical cancer screening | CPT                 | 88148       | Cytopathology smears, cervical or vaginal; screening by automated system with manual rescreening under physician supervision                                                                                                  |
| cervical cancer screening | CPT                 | 88150       | Cytopathology, slides, cervical or vaginal; manual screening under physician supervision                                                                                                                                      |
| cervical cancer screening | CPT                 | 88152       | Cytopathology, slides, cervical or vaginal; with manual screening and computer-assisted rescreening under physician supervision                                                                                               |
| cervical cancer screening | CPT                 | 88153       | Cytopathology, slides, cervical or vaginal; with manual screening and rescreening under physician supervision                                                                                                                 |

|                           |           |       |                                                                                                                                                                                                                                   |
|---------------------------|-----------|-------|-----------------------------------------------------------------------------------------------------------------------------------------------------------------------------------------------------------------------------------|
| cervical cancer screening | CPT       | 88154 | Cytopathology, slides, cervical or vaginal; with manual screening and computer-assisted rescreening using cell selection and review under physician supervision                                                                   |
| cervical cancer screening | CPT       | 88164 | Cytopathology, slides, cervical or vaginal (the Bethesda System); manual screening under physician supervision                                                                                                                    |
| cervical cancer screening | CPT       | 88165 | Cytopathology, slides, cervical or vaginal (the Bethesda System); with manual screening and rescreening under physician supervision                                                                                               |
| cervical cancer screening | CPT       | 88166 | Cytopathology, slides, cervical or vaginal (the Bethesda System); with manual screening and computer-assisted rescreening under physician supervision                                                                             |
| cervical cancer screening | CPT       | 88167 | Cytopathology, slides, cervical or vaginal (the Bethesda System); with manual screening and computer-assisted rescreening using cell selection and review under physician supervision                                             |
| cervical cancer screening | CPT       | 88174 | Cytopathology, cervical or vaginal (any reporting system), collected in preservative fluid, automated thin layer preparation; screening by automated system, under physician supervision                                          |
| cervical cancer screening | CPT       | 88175 | Cytopathology, cervical or vaginal (any reporting system), collected in preservative fluid, automated thin layer preparation; with screening by automated system and manual rescreening or review, under physician supervision    |
| cervical cancer screening | CPT       | 87623 | HPV genotyping, low risk                                                                                                                                                                                                          |
| cervical cancer screening | CPT       | 87624 | HPV genotyping, high risk                                                                                                                                                                                                         |
| cervical cancer screening | CPT       | 87625 | HPV genotyping 16, 18, 45                                                                                                                                                                                                         |
| STI screening             | ICD-10-CM | Z113  | Encounter for screening for infections with a predominantly sexual mode of transmission                                                                                                                                           |
| STI screening             | ICD-10-CM | Z114  | Encounter for screening for human immunodeficiency virus [HIV]                                                                                                                                                                    |
| STI screening             | ICD-10-CM | Z7251 | High risk heterosexual behavior                                                                                                                                                                                                   |
| STI screening             | ICD-10-CM | Z7252 | High risk homosexual behavior                                                                                                                                                                                                     |
| STI screening             | ICD-10-CM | Z7253 | High risk bisexual behavior                                                                                                                                                                                                       |
| STI screening             | ICD-10-CM | Z725  | High-risk sexual behavior                                                                                                                                                                                                         |
| STI screening             | HCPCS     | G0445 | High intensity behavioral counseling to prevent sexually transmitted infection; face-to-face, individual, includes: education, skills training and guidance on how to change sexual behavior; performed semi-annually, 30 minutes |
| STI screening             | CPT       | 86631 | Antibody; Chlamydia                                                                                                                                                                                                               |
| STI screening             | CPT       | 86632 | Antibody; Chlamydia, IgM                                                                                                                                                                                                          |
| STI screening             | CPT       | 87110 | Culture, chlamydia, any source                                                                                                                                                                                                    |
| STI screening             | CPT       | 87270 | Infectious agent antigen detection by immunofluorescent technique; Chlamydia trachomatis                                                                                                                                          |
| STI screening             | CPT       | 87320 | Infectious agent antigen detection by enzyme immunoassay technique, qualitative or semiquantitative, multiple-step method; Chlamydia trachomatis                                                                                  |
| STI screening             | CPT       | 87490 | Infectious agent detection by nucleic acid (DNA or RNA); Chlamydia trachomatis, direct probe technique                                                                                                                            |
| STI screening             | CPT       | 87491 | Infectious agent detection by nucleic acid (DNA or RNA); Chlamydia trachomatis, amplified probe technique                                                                                                                         |
| STI screening             | CPT       | 87810 | Infectious agent antigen detection by immunoassay with direct optical observation; Chlamydia trachomatis                                                                                                                          |
| STI screening             | CPT       | 87800 | Infectious agent detection by nucleic acid (DNA or RNA), multiple organisms; direct probe(s) technique                                                                                                                            |
| STI screening             | CPT       | 87590 | Infectious agent detection by nucleic acid (DNA or RNA); Neisseria gonorrhoea, direct probe technique                                                                                                                             |
| STI screening             | CPT       | 87591 | Infectious agent detection by nucleic acid (DNA or RNA); Neisseria gonorrhoea, amplified probe technique                                                                                                                          |
| STI screening             | CPT       | 87850 | Infectious agent antigen detection by immunoassay with direct optical observation; Neisseria gonorrhoea                                                                                                                           |

|               |            |             |                                                                                                                                                               |
|---------------|------------|-------------|---------------------------------------------------------------------------------------------------------------------------------------------------------------|
| STI screening | CPT        | 86592       | Syphilis test, non-treponemal antibody; qualitative (eg, VDRL, RPR, ART)                                                                                      |
| STI screening | CPT        | 86593       | Syphilis test, non-treponemal antibody; quantitative                                                                                                          |
| STI screening | CPT        | 86780       | Antibody; Treponema pallidum                                                                                                                                  |
| STI screening | CPT        | 86701       | HIV-1                                                                                                                                                         |
| STI screening | CPT        | 86702       | HIV-2                                                                                                                                                         |
| STI screening | CPT        | 86703       | HIV-1 and HIV-2, single result                                                                                                                                |
| STI screening | CPT        | 87389       | HIV-1 antigen(s), with HIV-1 and HIV-2 antibodies, single result                                                                                              |
| STI screening | HCPCS      | G0432       | Infectious agent antibody detection by enzyme Immune assay (EIA) technique, qualitative or Semi-quantitative, multiple-step method, HIV-1 or HIV-2, screening |
| STI screening | HCPCS      | G0433       | Infectious agent antibody detection by enzyme-linked immunosorbent assay (ELISA) technique, antibody, HIV-1 or HIV2, screening                                |
| STI screening | HCPCS      | G0435       | Infectious agent antibody detection by rapid antibody test of oral mucosa transudate, HIV-1 or HIV-2, screening.                                              |
| STI screening | HCPCS      | G0475       | HIV combination assay                                                                                                                                         |
| IUD           | ICD-10-CM  | Z30430      | Encounter for insertion of intrauterine contraceptive device                                                                                                  |
| IUD           | ICD-10-CM  | Z30014      | Encounter for initial prescription of intrauterine contraceptive device                                                                                       |
| IUD           | ICD-10-CM  | Z30433      | Encounter for removal and reinsertion of intrauterine contraceptive device                                                                                    |
| IUD           | ICD-10-PCS | 0UH97HZ     | Insertion of Contraceptive Device into Uterus, Via Natural or Artificial Opening                                                                              |
| IUD           | ICD-10-PCS | 0UH98HZ     | Insertion of Contraceptive Device into Uterus, Via Natural or Artificial Opening Endoscopic                                                                   |
| IUD           | ICD-10-PCS | 0UHC7HZ     | Insertion of Contraceptive Device into Cervix, Via Natural or Artificial Opening                                                                              |
| IUD           | ICD-10-PCS | 0UHC8HZ     | Insertion of Contraceptive Device into Cervix, Via Natural or Artificial Opening Endoscopic                                                                   |
| IUD           | ICD-10-PCS | 0UH90HZ     | Insertion of Contraceptive Device into Uterus, Open Approach                                                                                                  |
| IUD           | CPT        | 58300       | Insertion of IUD                                                                                                                                              |
| IUD           | HCPCS      | J7300       | Intrauterine copper contraceptive                                                                                                                             |
| IUD           | HCPCS      | J7301       | Levonorgestrel-releasing intrauterine contraceptive system, 13.5 mg                                                                                           |
| IUD           | HCPCS      | J7302       | Levonorgestrel- releasing intrauterine contraceptive system, 52 mg                                                                                            |
| IUD           | HCPCS      | S4989       | Contraceptive intrauterine device (e.g. progesterone), including implants and supplies                                                                        |
| IUD           | HCPCS      | Q0090       | Levonorgestrel-releasing intrauterine contraceptive system, (skyla), 13.5 mg                                                                                  |
| IUD           | HCPCS      | S4981       | Insertion of levonorgestrel- releasing intrauterine system                                                                                                    |
| IUD           | HCPCS      | J7297       | Levonorgestrel-releasing intrauterine contraceptive system, 52 mg, 3 years duration                                                                           |
| IUD           | HCPCS      | J7298       | Levonorgestrel-releasing intrauterine contraceptive system, 52 mg, 5 year duration                                                                            |
| IUD           | NDC        | 50419042101 | Mirena                                                                                                                                                        |
| IUD           | NDC        | 50419042201 | Skyla                                                                                                                                                         |
| IUD           | NDC        | 51285020401 | ParaGard                                                                                                                                                      |
| IUD           | NDC        | 50419042208 | Skyla                                                                                                                                                         |
| IUD           | NDC        | 50419042271 | Skyla                                                                                                                                                         |
| IUD           | NDC        | 50419042301 | Mirena                                                                                                                                                        |
| IUD           | NDC        | 51285020402 | ParaGard                                                                                                                                                      |
| IUD           | NDC        | 52544003554 | Liletta                                                                                                                                                       |
| IUD           | NDC        | 00023585801 | Liletta                                                                                                                                                       |
| IUD           | NDC        | 50419042401 | Kyleena                                                                                                                                                       |
| IUD           | NDC        | 50419042408 | Kyleena                                                                                                                                                       |
| IUD           | NDC        | 50419042471 | Kyleena                                                                                                                                                       |
| IUD           | NDC        | 50419042308 | Mirena                                                                                                                                                        |
| implant       | ICD-10-CM  | Z30017      | Encounter for initial prescription of implantable subdermal contraceptive                                                                                     |
| implant       | CPT        | 11981       | Insertion, non- biodegradable drug delivery implant, Implanon or Nexplanon                                                                                    |

|         |           |             |                                                                                           |
|---------|-----------|-------------|-------------------------------------------------------------------------------------------|
| implant | HCPS      | J7306       | Levonorgestrel (contraceptive) implant system, including implants and supplies            |
| implant | HCPS      | J7307       | Etonogestrel [contraceptive] implant system, including implant and supplies               |
| implant | CPT       | 11983       | Removal with reinsertion, non- biodegradable drug delivery implant, Implanon or Nexplanon |
| implant | HCPS      | J7306       | Levonorgestrel (contraceptive) implant system, including implants and supplies            |
| implant | HCPS      | J7307       | Etonogestrel [contraceptive] implant system, including implant and supplies               |
| implant | NDC       | 00052027201 | IMPLANON                                                                                  |
| implant | NDC       | 00052027401 | NEXPLANON                                                                                 |
| implant | NDC       | 00052433001 | NEXPLANON                                                                                 |
| implant | NDC       | 00052027480 | NEXPLANON                                                                                 |
| pill    | ICD-10-CM | Z30011      | Encounter for initial prescription of contraceptive pills                                 |
| pill    | ICD-10-CM | Z3041       | Encounter for surveillance of contraceptive pills                                         |
| pill    | HCPCS     | S4993       | Contraceptive pills for birth control                                                     |
| pill    | NDC       | 00008111720 | Lybrel                                                                                    |
| pill    | NDC       | 00008111730 | Lybrel                                                                                    |
| pill    | NDC       | 00008251402 | Lo/Ovral-28                                                                               |
| pill    | NDC       | 00008253505 | Triphasil-21                                                                              |
| pill    | NDC       | 00008253601 | Triphasil-28                                                                              |
| pill    | NDC       | 00008253605 | Triphasil-28                                                                              |
| pill    | NDC       | 00052026106 | Desogen                                                                                   |
| pill    | NDC       | 00052028306 | Cyclessa                                                                                  |
| pill    | NDC       | 00062125100 | Ortho Tri-Cyclen Lo                                                                       |
| pill    | NDC       | 00062125115 | Ortho Tri-Cyclen Lo                                                                       |
| pill    | NDC       | 00062125120 | Ortho Tri-Cyclen Lo                                                                       |
| pill    | NDC       | 00062133220 | Ortho-Novum 1/50                                                                          |
| pill    | NDC       | 00062141116 | Ortho Micronor                                                                            |
| pill    | NDC       | 00062141123 | Ortho Micronor                                                                            |
| pill    | NDC       | 00062171400 | Modicon                                                                                   |
| pill    | NDC       | 00062171415 | Modicon                                                                                   |
| pill    | NDC       | 00062176100 | Ortho-Novum 1/35                                                                          |
| pill    | NDC       | 00062176115 | Ortho-Novum 1/35                                                                          |
| pill    | NDC       | 00062178100 | Ortho-Novum 7/7/7                                                                         |
| pill    | NDC       | 00062178115 | Ortho-Novum 7/7/7                                                                         |
| pill    | NDC       | 00062179600 | Ortho-Cept                                                                                |
| pill    | NDC       | 00062179615 | Ortho-Cept                                                                                |
| pill    | NDC       | 00062190120 | Ortho-Cyclen                                                                              |
| pill    | NDC       | 00062190320 | Ortho Tri-Cyclen                                                                          |
| pill    | NDC       | 00062190700 | Ortho-Cyclen                                                                              |
| pill    | NDC       | 00062190715 | Ortho-Cyclen                                                                              |
| pill    | NDC       | 00062191000 | Ortho Tri-Cyclen                                                                          |
| pill    | NDC       | 00062191015 | Ortho Tri-Cyclen                                                                          |
| pill    | NDC       | 00247052028 | Tri-Norinyl                                                                               |
| pill    | NDC       | 00247069028 | Ortho-Cyclen                                                                              |
| pill    | NDC       | 00247069128 | Ortho Tri-Cyclen                                                                          |
| pill    | NDC       | 00247069228 | Triphasil-28                                                                              |
| pill    | NDC       | 00247139828 | Ovcon 50                                                                                  |
| pill    | NDC       | 00247151328 | Ovcon 35                                                                                  |
| pill    | NDC       | 00247151628 | Tri-Levlen                                                                                |
| pill    | NDC       | 00247151728 | Desogen                                                                                   |
| pill    | NDC       | 00247176404 | Loestrin 21 1/20                                                                          |
| pill    | NDC       | 00247176421 | Loestrin 21 1/20                                                                          |
| pill    | NDC       | 00247176521 | Loestrin 21 1.5/30                                                                        |
| pill    | NDC       | 00247198621 | Yasmin                                                                                    |

|      |     |             |                                  |
|------|-----|-------------|----------------------------------|
| pill | NDC | 00247198628 | Yasmin                           |
| pill | NDC | 00247200828 | Loestrin 21 1/20                 |
| pill | NDC | 00247201004 | Lo/Ovral-28                      |
| pill | NDC | 00247201008 | Lo/Ovral-28                      |
| pill | NDC | 00247201028 | Lo/Ovral-28                      |
| pill | NDC | 00247201228 | Ortho-Cyclen                     |
| pill | NDC | 00247201328 | Ortho-Novum 7/7/7                |
| pill | NDC | 00247214728 | Ortho Tri-Cyclen Lo              |
| pill | NDC | 00247216928 | Tri-Sprintec                     |
| pill | NDC | 00247217028 | Trivora-28                       |
| pill | NDC | 00247223028 | Mircette                         |
| pill | NDC | 00247223528 | Kariva                           |
| pill | NDC | 00247226028 | Ortho-Novum 1/35                 |
| pill | NDC | 00247226828 | Yasmin                           |
| pill | NDC | 00378655053 | Ethinyl Estradiol-Levonorgestrel |
| pill | NDC | 00378727253 | Norethindrone                    |
| pill | NDC | 00378729253 | Norethindrone                    |
| pill | NDC | 00430042014 | Lo Loestrin Fe                   |
| pill | NDC | 00430048214 | Femcon FE                        |
| pill | NDC | 00430053014 | Loestrin 24 Fe                   |
| pill | NDC | 00430053550 | Minastrin 24 Fe                  |
| pill | NDC | 00430057014 | Estrostep Fe                     |
| pill | NDC | 00430057045 | Estrostep Fe                     |
| pill | NDC | 00430058014 | Ovcon 35                         |
| pill | NDC | 00430058045 | Ovcon 35                         |
| pill | NDC | 00430058114 | Ovcon 35 Fe                      |
| pill | NDC | 00430058514 | Ovcon 50                         |
| pill | NDC | 00430058545 | Ovcon 50                         |
| pill | NDC | 00555034458 | Errin                            |
| pill | NDC | 00555071558 | Camila                           |
| pill | NDC | 00555900867 | Nortrel 0.5/35                   |
| pill | NDC | 00555900942 | Nortrel 1/35                     |
| pill | NDC | 00555901058 | Nortrel 1/35                     |
| pill | NDC | 00555901258 | Nortrel 7/7/7                    |
| pill | NDC | 00555901467 | Lessina                          |
| pill | NDC | 00555901658 | Sprintec                         |
| pill | NDC | 00555901858 | Tri-Sprintec                     |
| pill | NDC | 00555902058 | Portia                           |
| pill | NDC | 00555902542 | Junel 1/20                       |
| pill | NDC | 00555902557 | Junel 1/20                       |
| pill | NDC | 00555902658 | Junel Fe 1/20                    |
| pill | NDC | 00555902742 | Junel 1.5/30                     |
| pill | NDC | 00555902757 | Junel 1.5/30                     |
| pill | NDC | 00555902858 | Junel Fe 1.5/30                  |
| pill | NDC | 00555903270 | Tri-Legest Fe                    |
| pill | NDC | 00555903458 | Balziva                          |
| pill | NDC | 00555904358 | Apri                             |
| pill | NDC | 00555904558 | Aviane                           |
| pill | NDC | 00555904758 | Enpresse                         |
| pill | NDC | 00555904958 | Cryselle 28                      |
| pill | NDC | 00555905058 | Kariva                           |
| pill | NDC | 00555905158 | Velivet                          |
| pill | NDC | 00555905167 | Velivet                          |
| pill | NDC | 00555906458 | Kelnor                           |
| pill | NDC | 00555906467 | Kelnor                           |

|      |     |             |                              |
|------|-----|-------------|------------------------------|
| pill | NDC | 00555906558 | Tri-Lo-Sprintec              |
| pill | NDC | 00555906658 | Aranelle                     |
| pill | NDC | 00555906667 | Aranelle                     |
| pill | NDC | 00555912366 | Jolessa                      |
| pill | NDC | 00555913167 | Ocella                       |
| pill | NDC | 00555913179 | Ocella                       |
| pill | NDC | 00603359017 | Gildagia                     |
| pill | NDC | 00603359049 | Gildagia                     |
| pill | NDC | 00603752117 | Cyclafem 1/35                |
| pill | NDC | 00603752149 | Cyclafem 1/35                |
| pill | NDC | 00603752517 | Cyclafem 7/7/7               |
| pill | NDC | 00603752549 | Cyclafem 7/7/7               |
| pill | NDC | 00603754017 | Emoquette                    |
| pill | NDC | 00603754049 | Emoquette                    |
| pill | NDC | 00603760615 | Gildess                      |
| pill | NDC | 00603760648 | Gildess                      |
| pill | NDC | 00603760715 | Gildess                      |
| pill | NDC | 00603760748 | Gildess                      |
| pill | NDC | 00603760817 | Gildess FE 1.5/30            |
| pill | NDC | 00603760917 | Gildess FE 1/20              |
| pill | NDC | 00603762517 | Myzilra                      |
| pill | NDC | 00603762549 | Myzilra                      |
| pill | NDC | 00603763417 | Orsythia                     |
| pill | NDC | 00603763449 | Orsythia                     |
| pill | NDC | 00603764017 | Previfem                     |
| pill | NDC | 00603764217 | Previfem                     |
| pill | NDC | 00603766317 | Tri-Previfem                 |
| pill | NDC | 00603766517 | Tri-Previfem                 |
| pill | NDC | 23490765301 | Desogen                      |
| pill | NDC | 23490767001 | Mircette                     |
| pill | NDC | 23490769901 | Lo/Ovral-28                  |
| pill | NDC | 24090080184 | Lo/Ovral-28                  |
| pill | NDC | 24090096184 | Ethinyl Estradiol-Norgestrel |
| pill | NDC | 35356001468 | Nortrel 1/35                 |
| pill | NDC | 35356001568 | Tri-Previfem                 |
| pill | NDC | 35356002168 | Ortho Tri-Cyclen             |
| pill | NDC | 35356025528 | Yaz                          |
| pill | NDC | 35356037028 | Cryselle 28                  |
| pill | NDC | 43386062030 | My Way                       |
| pill | NDC | 45802084054 | Levonorgestrel               |
| pill | NDC | 50419040201 | Yasmin                       |
| pill | NDC | 50419040203 | Yasmin                       |
| pill | NDC | 50419040303 | Safyral                      |
| pill | NDC | 50419040503 | Yaz                          |
| pill | NDC | 50419040701 | Beyaz                        |
| pill | NDC | 50419040703 | Beyaz                        |
| pill | NDC | 50419041112 | Levlen                       |
| pill | NDC | 50419041128 | Levlen                       |
| pill | NDC | 50419043306 | Tri-Levlen                   |
| pill | NDC | 50419043312 | Tri-Levlen                   |
| pill | NDC | 50452025115 | Ortho Tri-Cyclen Lo          |
| pill | NDC | 50458017115 | Modicon                      |
| pill | NDC | 50458017615 | Ortho-Novum 1/35             |
| pill | NDC | 50458017815 | Ortho-Novum 7/7/7            |
| pill | NDC | 50458019115 | Ortho Tri-Cyclen             |

|      |     |             |                     |
|------|-----|-------------|---------------------|
| pill | NDC | 50458019411 | Ortho Micronor      |
| pill | NDC | 50458019416 | Ortho Micronor      |
| pill | NDC | 50458019615 | Ortho-Cept          |
| pill | NDC | 50458019715 | Ortho-Cyclen        |
| pill | NDC | 50458025115 | Ortho Tri-Cyclen Lo |
| pill | NDC | 51285005866 | Seasonale           |
| pill | NDC | 51285007997 | Loestrin 21 1/20    |
| pill | NDC | 51285008070 | Loestrin Fe 1/20    |
| pill | NDC | 51285008198 | Loestrin Fe 1/20    |
| pill | NDC | 51285008297 | Loestrin 21 1.5/30  |
| pill | NDC | 51285008370 | Loestrin Fe 1.5/30  |
| pill | NDC | 51285008498 | Loestrin Fe 1.5/30  |
| pill | NDC | 51285008787 | Seasonique          |
| pill | NDC | 51285009158 | Nordette            |
| pill | NDC | 51285009287 | LoSeasonique        |
| pill | NDC | 51285011458 | Mircette            |
| pill | NDC | 51285043165 | Quartette           |
| pill | NDC | 51285054628 | Cryselle 28         |
| pill | NDC | 51285076993 | Plan B              |
| pill | NDC | 51285094288 | Plan B One-Step     |
| pill | NDC | 51285094388 | Plan B One-Step     |
| pill | NDC | 52544014331 | Tilia Fe            |
| pill | NDC | 52544017572 | Tilia Fe            |
| pill | NDC | 52544020431 | Generess Fe         |
| pill | NDC | 52544021028 | Zenchent Fe         |
| pill | NDC | 52544021928 | Leena               |
| pill | NDC | 52544022829 | Amethia Lo          |
| pill | NDC | 52544023528 | Nor-QD              |
| pill | NDC | 52544023531 | Nor-QD              |
| pill | NDC | 52544024531 | Necon 1/50          |
| pill | NDC | 52544024728 | Mononessa           |
| pill | NDC | 52544024828 | TriNessa            |
| pill | NDC | 52544025428 | Brevicon            |
| pill | NDC | 52544025928 | Norinyl 1+35        |
| pill | NDC | 52544025988 | Norinyl 1+35        |
| pill | NDC | 52544026528 | Norinyl 1+50        |
| pill | NDC | 52544026531 | Norinyl 1+50        |
| pill | NDC | 52544026829 | Amethia             |
| pill | NDC | 52544026884 | Amethia             |
| pill | NDC | 52544027428 | Tri-Norinyl         |
| pill | NDC | 52544027431 | Tri-Norinyl         |
| pill | NDC | 52544027536 | Next Choice         |
| pill | NDC | 52544027928 | Levora              |
| pill | NDC | 52544028754 | Next Choice         |
| pill | NDC | 52544029128 | Trivora-28          |
| pill | NDC | 52544029231 | Zenchent Fe         |
| pill | NDC | 52544029241 | Zenchent Fe         |
| pill | NDC | 52544029528 | Amethyst            |
| pill | NDC | 52544038328 | Zovia 1/35          |
| pill | NDC | 52544038428 | Zovia 1/50          |
| pill | NDC | 52544047536 | Next Choice         |
| pill | NDC | 52544055028 | Necon 0.5/35        |
| pill | NDC | 52544055228 | Necon 1/35          |
| pill | NDC | 52544055428 | Necon 10/11         |
| pill | NDC | 52544062928 | Nora-Be             |



|      |     |             |                       |
|------|-----|-------------|-----------------------|
| pill | NDC | 52544063028 | Microgestin FE 1/20   |
| pill | NDC | 52544063128 | Microgestin FE 1.5/30 |
| pill | NDC | 52544084728 | Low-Ogestrel          |
| pill | NDC | 52544084828 | Ogestrel-28           |
| pill | NDC | 52544089228 | Jolivette             |
| pill | NDC | 52544093628 | Necon 7/7/7           |
| pill | NDC | 52544094028 | Azurette              |
| pill | NDC | 52544094928 | Lutera                |
| pill | NDC | 52544095021 | Microgestin 1/20      |
| pill | NDC | 52544095121 | Microgestin 1.5/30    |
| pill | NDC | 52544095328 | Zenchant Fe           |
| pill | NDC | 52544095428 | Reclipsen             |
| pill | NDC | 52544095931 | Caziant               |
| pill | NDC | 52544096691 | Quasense              |
| pill | NDC | 52544096728 | Sronyx                |
| pill | NDC | 52544098131 | Zarah                 |
| pill | NDC | 52544098231 | Vestura               |
| pill | NDC | 52959045002 | Next Choice           |
| pill | NDC | 54569067900 | Lo/Ovral-28           |
| pill | NDC | 54569068500 | Ortho-Novum 1/35      |
| pill | NDC | 54569068501 | Ortho-Novum 1/35      |
| pill | NDC | 54569068900 | Ortho-Novum 7/7/7     |
| pill | NDC | 54569068901 | Ortho-Novum 7/7/7     |
| pill | NDC | 54569143900 | Tri-Levlen            |
| pill | NDC | 54569384400 | Levlen                |
| pill | NDC | 54569422200 | Desogen               |
| pill | NDC | 54569422201 | Desogen               |
| pill | NDC | 54569426900 | Ortho Tri-Cyclen      |
| pill | NDC | 54569427301 | Ortho-Cyclen          |
| pill | NDC | 54569481700 | Zovia 1/35            |
| pill | NDC | 54569487800 | Apri                  |
| pill | NDC | 54569487801 | Apri                  |
| pill | NDC | 54569489000 | Mircette              |
| pill | NDC | 54569498400 | Ortho Micronor        |
| pill | NDC | 54569499700 | Levora                |
| pill | NDC | 54569499800 | Low-Ogestrel          |
| pill | NDC | 54569516100 | Nor-QD                |
| pill | NDC | 54569534300 | Plan B                |
| pill | NDC | 54569534900 | Yasmin                |
| pill | NDC | 54569549300 | Ortho Tri-Cyclen Lo   |
| pill | NDC | 54569549302 | Ortho Tri-Cyclen Lo   |
| pill | NDC | 54569579600 | TriNessa              |
| pill | NDC | 54569579700 | Microgestin FE 1/20   |
| pill | NDC | 54569579800 | Lutera                |
| pill | NDC | 54569581600 | Mononessa             |
| pill | NDC | 54569582600 | Kariva                |
| pill | NDC | 54569603200 | Reclipsen             |
| pill | NDC | 54569612800 | Ocella                |
| pill | NDC | 54569614400 | Yaz                   |
| pill | NDC | 54569614500 | Plan B One-Step       |
| pill | NDC | 54569627200 | Gianvi                |
| pill | NDC | 54569628000 | Previfem              |
| pill | NDC | 54569628100 | Tri-Previfem          |
| pill | NDC | 54868042800 | Lo/Ovral-28           |
| pill | NDC | 54868044300 | Ortho-Novum 1/35      |

|      |     |             |                                  |
|------|-----|-------------|----------------------------------|
| pill | NDC | 54868050200 | Loestrin Fe 1.5/30               |
| pill | NDC | 54868050700 | Nordette                         |
| pill | NDC | 54868050801 | Ortho-Novum 7/7/7                |
| pill | NDC | 54868050901 | Ovcon 35                         |
| pill | NDC | 54868051600 | Tri-Norinyl                      |
| pill | NDC | 54868151200 | Loestrin Fe 1/20                 |
| pill | NDC | 54868156400 | Levlen                           |
| pill | NDC | 54868231600 | Seasonale                        |
| pill | NDC | 54868260600 | Ortho-Cyclen                     |
| pill | NDC | 54868270100 | Ortho-Cept                       |
| pill | NDC | 54868377200 | Ovcon 50                         |
| pill | NDC | 54868386300 | Desogen                          |
| pill | NDC | 54868394800 | Estrostep Fe                     |
| pill | NDC | 54868409300 | Ortho Tri-Cyclen                 |
| pill | NDC | 54868423900 | Trivora-28                       |
| pill | NDC | 54868436900 | Ortho Micronor                   |
| pill | NDC | 54868453800 | Necon 0.5/35                     |
| pill | NDC | 54868459000 | Yasmin                           |
| pill | NDC | 54868460700 | Levora                           |
| pill | NDC | 54868473000 | Ortho Tri-Cyclen Lo              |
| pill | NDC | 54868473100 | Mircette                         |
| pill | NDC | 54868474200 | Kariva                           |
| pill | NDC | 54868474500 | Microgestin FE 1.5/30            |
| pill | NDC | 54868475400 | Apri                             |
| pill | NDC | 54868477600 | Nortrel 1/35                     |
| pill | NDC | 54868481400 | Camila                           |
| pill | NDC | 54868482800 | Sprintec                         |
| pill | NDC | 54868485100 | Cryselle 28                      |
| pill | NDC | 54868486000 | Enpresse                         |
| pill | NDC | 54868491100 | Cyclessa                         |
| pill | NDC | 54868502800 | Tri-Sprintec                     |
| pill | NDC | 54868528600 | Nortrel 7/7/7                    |
| pill | NDC | 54868532600 | Junel Fe 1/20                    |
| pill | NDC | 54868535600 | Aviane                           |
| pill | NDC | 54868582600 | TriNessa                         |
| pill | NDC | 54868582800 | Yaz                              |
| pill | NDC | 54868594200 | Kelnor                           |
| pill | NDC | 55045283902 | Plan B                           |
| pill | NDC | 55045348506 | Lo/Ovral-28                      |
| pill | NDC | 55045349701 | Low-Ogestrel                     |
| pill | NDC | 55045349801 | Errin                            |
| pill | NDC | 55045378106 | Tri-Sprintec                     |
| pill | NDC | 55045378206 | Enpresse                         |
| pill | NDC | 55045378302 | Plan B                           |
| pill | NDC | 55289024708 | Nordette                         |
| pill | NDC | 55289088704 | Ogestrel-28                      |
| pill | NDC | 55887005228 | Microgestin FE 1.5/30            |
| pill | NDC | 55887028628 | Nortrel 1/35                     |
| pill | NDC | 58016474701 | Junel 1/20                       |
| pill | NDC | 58016482701 | Jolivette                        |
| pill | NDC | 66993061128 | Solia                            |
| pill | NDC | 66993061528 | Cesia                            |
| pill | NDC | 68180084313 | Ethinyl Estradiol-Levonorgestrel |
| pill | NDC | 68180084413 | Kurvelo                          |
| pill | NDC | 68180084613 | Daysee                           |

|      |     |             |                                                                              |
|------|-----|-------------|------------------------------------------------------------------------------|
| pill | NDC | 68180084813 | Ethinyl Estradiol-Levonorgestrel                                             |
| pill | NDC | 68180085413 | Ethinyl Estradiol-Levonorgestrel                                             |
| pill | NDC | 68180087611 | Norethindrone                                                                |
| pill | NDC | 68180087613 | Norethindrone                                                                |
| pill | NDC | 68180089713 | Ethinyl Estradiol-Norethindrone                                              |
| pill | NDC | 68180089813 | Wymzya Fe                                                                    |
| pill | NDC | 68180090213 | Drospirenone-Ethinyl Estradiol                                               |
| pill | NDC | 68462030329 | Heather                                                                      |
| pill | NDC | 68462030529 | Norethindrone                                                                |
| pill | NDC | 68462030929 | Ethinyl Estradiol-Norgestimate                                               |
| pill | NDC | 68462031629 | Briellyn                                                                     |
| pill | NDC | 68462031829 | Viorele                                                                      |
| pill | NDC | 68462038829 | Marlissa                                                                     |
| pill | NDC | 68462039429 | Alyacen 1/35                                                                 |
| pill | NDC | 68462055629 | Alyacen 7/7/7                                                                |
| pill | NDC | 68462056529 | Ethinyl Estradiol-Norgestimate                                               |
| pill | NDC | 68462063729 | LEVONORGESTREL-ETH ESTRADIOL                                                 |
| pill | NDC | 68462064693 | Ashlyna                                                                      |
| pill | NDC | 00052026108 | Desogen                                                                      |
| pill | NDC | 00093313491 | Camrese                                                                      |
| pill | NDC | 00093614891 | Camrese Lo                                                                   |
| pill | NDC | 00378655056 | LEVONORGESTREL AND ETHINYL ESTRADIOL                                         |
| pill | NDC | 00378727753 | NORGESTIMATE AND ETHINYL ESTRADIOL                                           |
| pill | NDC | 00378728098 | NORETHINDRONE ACETATE AND ETHINYL ESTRADIOL                                  |
| pill | NDC | 00378728398 | NORETHINDRONE ACETATE AND ETHINYL ESTRADIOL                                  |
| pill | NDC | 00378728590 | LEVONORG-ETH ESTRAD ETH ESTRAD                                               |
| pill | NDC | 00378728756 | LEVONORGESTREL AND ETHINYL ESTRADIOL                                         |
| pill | NDC | 00378729656 | DESOGESTREL AND ETHINYL ESTRADIOL AND ETHINYL                                |
| pill | NDC | 00378729853 | LEVONORGESTREL-ETH ESTRADIOL                                                 |
| pill | NDC | 00378730053 | DROSPIRENONE AND ETHINYL ESTRADIOL                                           |
| pill | NDC | 00430042060 | Lo Loestrin Fe                                                               |
| pill | NDC | 00430042095 | Lo Loestrin Fe                                                               |
| pill | NDC | 00430048295 | FEMCON Fe                                                                    |
| pill | NDC | 00430053060 | Loestrin 24 Fe                                                               |
| pill | NDC | 00430053095 | Loestrin 24 Fe                                                               |
| pill | NDC | 00430057060 | ESTROSTEP Fe                                                                 |
| pill | NDC | 00781407515 | Drospirenone/Ethinyl Estradiol/Levomefolate Calcium and Levomefolate Calcium |
| pill | NDC | 00781410352 | Drospirenone/Ethinyl Estradiol/Levomefolate Calcium and Levomefolate Calcium |
| pill | NDC | 00781557515 | Vienva TM                                                                    |
| pill | NDC | 16714034001 | LEVONEST                                                                     |
| pill | NDC | 16714034002 | LEVONEST                                                                     |
| pill | NDC | 16714034003 | LEVONEST                                                                     |
| pill | NDC | 16714034601 | Dasetta 7/7/7                                                                |
| pill | NDC | 16714034602 | Dasetta 7/7/7                                                                |
| pill | NDC | 16714034603 | Dasetta 7/7/7                                                                |
| pill | NDC | 16714034802 | Dasetta 1/35                                                                 |
| pill | NDC | 16714034803 | Dasetta 1/35                                                                 |
| pill | NDC | 16714035901 | FALMINA                                                                      |
| pill | NDC | 16714035902 | FALMINA                                                                      |
| pill | NDC | 16714036001 | Mono-Linyah                                                                  |
| pill | NDC | 16714036002 | Mono-Linyah                                                                  |
| pill | NDC | 16714036003 | Mono-Linyah                                                                  |
| pill | NDC | 16714036301 | Tri-Linyah                                                                   |

|      |     |             |                   |
|------|-----|-------------|-------------------|
| pill | NDC | 16714036302 | Tri-Linyah        |
| pill | NDC | 16714036303 | Tri-Linyah        |
| pill | NDC | 16714036501 | ELINEST           |
| pill | NDC | 16714036502 | ELINEST           |
| pill | NDC | 16714036503 | ELINEST           |
| pill | NDC | 16714036603 | SETLAKIN          |
| pill | NDC | 16714037001 | Wera              |
| pill | NDC | 16714037002 | Wera              |
| pill | NDC | 16714037004 | Wera              |
| pill | NDC | 16714040701 | Larin 1.5/30      |
| pill | NDC | 16714040702 | Larin 1.5/30      |
| pill | NDC | 16714040704 | Larin 1.5/30      |
| pill | NDC | 16714041601 | Larin 24 Fe       |
| pill | NDC | 16714041602 | Larin 24 Fe       |
| pill | NDC | 16714041603 | Larin 24 Fe       |
| pill | NDC | 16714041604 | Larin 24 Fe       |
| pill | NDC | 16714044001 | DEBLITANE         |
| pill | NDC | 16714044002 | DEBLITANE         |
| pill | NDC | 16714044003 | DEBLITANE         |
| pill | NDC | 16714044101 | SHAROBEL          |
| pill | NDC | 16714044102 | SHAROBEL          |
| pill | NDC | 16714044103 | SHAROBEL          |
| pill | NDC | 16714046401 | Juleber           |
| pill | NDC | 16714046402 | Juleber           |
| pill | NDC | 16714046403 | Juleber           |
| pill | NDC | 16714046404 | Juleber           |
| pill | NDC | 21695040701 | Trinessa          |
| pill | NDC | 21695068528 | Tilia FE          |
| pill | NDC | 21695077001 | Tri-Sprintec      |
| pill | NDC | 21695085501 | Enpresse          |
| pill | NDC | 21695085701 | Necon             |
| pill | NDC | 21695099528 | Aviane            |
| pill | NDC | 34908062051 | LEVONEST          |
| pill | NDC | 34908062053 | LEVONEST          |
| pill | NDC | 34908062056 | LEVONEST          |
| pill | NDC | 50090015901 | Ortho-Novum       |
| pill | NDC | 50419040300 | Safyral           |
| pill | NDC | 50419040370 | Safyral           |
| pill | NDC | 50419040375 | Safyral           |
| pill | NDC | 50419040700 | Beyaz             |
| pill | NDC | 50419040770 | Beyaz             |
| pill | NDC | 50419040775 | Beyaz             |
| pill | NDC | 50458017820 | Ortho-Novum       |
| pill | NDC | 50458019120 | Ortho Tri Cyclen  |
| pill | NDC | 50458019423 | Ortho Micronor    |
| pill | NDC | 50458019720 | Ortho Cyclen      |
| pill | NDC | 51285012870 | Loestrin FE       |
| pill | NDC | 52544005431 | Tilia Fe          |
| pill | NDC | 52544008728 | TriNessa Lo       |
| pill | NDC | 52544016528 | Necon             |
| pill | NDC | 52544016731 | Microgestin 24 Fe |
| pill | NDC | 52544022891 | Amethia Lo        |
| pill | NDC | 52544038331 | Zovia 1/35E-28    |
| pill | NDC | 52544038431 | Zovia 1/50E-28    |
| pill | NDC | 52544055031 | Necon 0.5/35      |

|      |     |             |                                             |
|------|-----|-------------|---------------------------------------------|
| pill | NDC | 52544055231 | NECON 1/35                                  |
| pill | NDC | 52544055431 | Necon 10/11                                 |
| pill | NDC | 52544084731 | Low-Ogestrel                                |
| pill | NDC | 52544098228 | Vestura                                     |
| pill | NDC | 54868404500 | Necon                                       |
| pill | NDC | 54868424000 | Zovia 1-35E                                 |
| pill | NDC | 54868474400 | Microgestin FE                              |
| pill | NDC | 54868477800 | Zovia 1-50E                                 |
| pill | NDC | 54868485000 | Low-Ogestrel                                |
| pill | NDC | 54868503100 | Velivet                                     |
| pill | NDC | 54868592200 | Ocella                                      |
| pill | NDC | 54868593500 | Junel FE                                    |
| pill | NDC | 54868604400 | Jolessa                                     |
| pill | NDC | 54868610000 | Loestrin 24 Fe                              |
| pill | NDC | 54868616100 | Femcon FE                                   |
| pill | NDC | 54868616200 | Gianvi                                      |
| pill | NDC | 54868621000 | Lutera                                      |
| pill | NDC | 54868627200 | Junel                                       |
| pill | NDC | 54868627300 | Zenchant                                    |
| pill | NDC | 54868627400 | Tilia FE                                    |
| pill | NDC | 54878727500 | LoSeasonique                                |
| pill | NDC | 54868627600 | Seasonique                                  |
| pill | NDC | 57297087713 | Jencycla                                    |
| pill | NDC | 61786038206 | desogestrel and ethinyl estradiol           |
| pill | NDC | 61786038506 | Caziant                                     |
| pill | NDC | 63187005428 | MonoNessa                                   |
| pill | NDC | 63187045828 | Tri-Sprintec                                |
| pill | NDC | 66116043628 | Tri-Sprintec                                |
| pill | NDC | 66116047028 | Gianvi                                      |
| pill | NDC | 68180083713 | TRI-LO-MARZIA                               |
| pill | NDC | 68180086413 | Blisovi 24 Fe                               |
| pill | NDC | 68180086513 | Blisovi Fe 1/20                             |
| pill | NDC | 68180086613 | Blisovi Fe 1.5/30                           |
| pill | NDC | 68180088013 | Bekyree                                     |
| pill | NDC | 68180090313 | Kaitlib Fe                                  |
| pill | NDC | 68258500502 | Necon 777                                   |
| pill | NDC | 68462013281 | Norethindrone Acetate and Ethinyl Estradiol |
| pill | NDC | 68462065629 | Norethindrone Acetate and Ethinyl Estradiol |
| pill | NDC | 68462065690 | Norethindrone Acetate and Ethinyl Estradiol |
| pill | NDC | 68462065729 | Norethindrone Acetate and Ethinyl Estradiol |
| pill | NDC | 68462065790 | Norethindrone Acetate and Ethinyl Estradiol |
| pill | NDC | 68462067295 | levonorgestrel and ethinyl estradiol        |
| pill | NDC | 68462071929 | norgestimate and ethinyl estradiol          |
| pill | NDC | 68462072029 | drosiprenone and ethinyl estradiol          |
| pill | NDC | 76388028301 | CYCLESSA                                    |
| pill | NDC | 76388028306 | CYCLESSA                                    |
| pill | NDC | 76413010428 | Cyclafem 7/7/7                              |
| pill | NDC | 76413010528 | Cyclafem 1/35                               |
| pill | NDC | 76413011128 | Levonorgestrel and Ethinyl Estradiol        |
| pill | NDC | 76413011628 | Myzilra                                     |
| pill | NDC | 76413011828 | Norethindrone                               |
| pill | NDC | 76413012128 | Previfem                                    |
| pill | NDC | 76413012828 | Tri-Sprintec                                |
| pill | NDC | 76413013028 | Yasmin                                      |
| pill | NDC | 00378728353 | NORETHIN-ETH ESTRA FERROUS FUM              |

|      |     |             |                                                              |
|------|-----|-------------|--------------------------------------------------------------|
| pill | NDC | 00378728753 | LEVONORGESTREL-ETH ESTRADIOL                                 |
| pill | NDC | 00378729653 | DESOGESTR-ETH ESTRAD ETH ESTRA                               |
| pill | NDC | 00430053750 | Lo Minastrin FE                                              |
| pill | NDC | 16714007304 | NORETHINDRONE                                                |
| pill | NDC | 16714035903 | Falmina                                                      |
| pill | NDC | 16714036704 | DESOGESTREL-ETHINYL ESTRADIOL                                |
| pill | NDC | 16714040402 | Pimtree                                                      |
| pill | NDC | 16714040404 | Pimtree                                                      |
| pill | NDC | 16714040501 | Larin FE                                                     |
| pill | NDC | 16714040504 | Larin FE                                                     |
| pill | NDC | 16714040601 | Larin FE                                                     |
| pill | NDC | 16714040604 | Larin FE                                                     |
| pill | NDC | 16714040803 | Larin                                                        |
| pill | NDC | 16714041304 | NORETHINDRONE                                                |
| pill | NDC | 50419040903 | Natazia                                                      |
| pill | NDC | 65162031684 | Lomedia 24 FE                                                |
| pill | NDC | 65162034784 | Zenchent Fe                                                  |
| pill | NDC | 68180087513 | Vyfemla                                                      |
| pill | NDC | 68180087711 | Jencycla                                                     |
| pill | NDC | 68180087713 | Jencycla                                                     |
| pill | NDC | 68180088613 | Nikki                                                        |
| pill | NDC | 68180089211 | Pirmella                                                     |
| pill | NDC | 68180089313 | Pirmella                                                     |
| pill | NDC | 75854060101 | FALESSA 1 MG TABLET                                          |
| pill | NDC | 63187074828 | NORETHINDRONE TAB 0.35 MG                                    |
| pill | NDC | 51862010206 | CAMILA® TABLETS 6X28                                         |
| pill | NDC | 00093542362 | GIANVI 3 MG-0.02 MG TABLET                                   |
| pill | NDC | 51862003603 | ZARAH                                                        |
| pill | NDC | 51862003601 | DROSPIRENONE-ETHINYL ESTRADIOL TAB 3-0.03 MG                 |
| pill | NDC | 51862026006 | ZOVIA® 1/35 TABLETS 6X28                                     |
| pill | NDC | 00378730653 | ETHYNODIOL DIACETATE & ETHINYL ESTRADIOL TAB 1 MG-50         |
| pill | NDC | 51862002801 | LEVONORGESTREL & ETHINYL ESTRADIOL TAB 0.1 MG-20 MCG         |
| pill | NDC | 51862054506 | SRONYX® TABLETS 6X28                                         |
| pill | NDC | 69238153106 | LEVONORGESTREL & ETHINYL ESTRADIOL TAB 0.1 MG-20 MCG         |
| pill | NDC | 51862002806 | LEVONORGESTREL & ETHINYL ESTRADIOL TAB 0.1 MG-20 MCG         |
| pill | NDC | 51862009706 | LEVONORGESTREL & ETHINYL ESTRADIOL TAB 0.15 MG-30 MCG        |
| pill | NDC | 51862031801 | NORETHINDRONE & ETHINYL ESTRADIOL TAB 0.5 MG-35 MCG          |
| pill | NDC | 51862031803 | NECON® 0.5/35 TABLETS 3X28                                   |
| pill | NDC | 51862000706 | NORETHINDRONE ACE & ETHINYL ESTRADIOL TAB 1 MG-20 MCG        |
| pill | NDC | 68462013279 | NORETHINDRONE ACE & ETHINYL ESTRADIOL TAB 1 MG-20 MCG        |
| pill | NDC | 51862027906 | MICROGESTIN® 1.5/30 TABLETS 6X21                             |
| pill | NDC | 51862027901 | NORETHINDRONE ACE & ETHINYL ESTRADIOL TAB 1.5 MG-30 MCG      |
| pill | NDC | 51862056406 | LOW-OGESTREL® TABLETS 6X28                                   |
| pill | NDC | 51862056401 | NORGESTREL & ETHINYL ESTRADIOL TAB 0.3 MG-30 MCG             |
| pill | NDC | 69238155106 | NORGESTIMATE & ETHINYL ESTRADIOL TAB 0.25 MG-35 MCG          |
| pill | NDC | 52544029841 | DROSPIRENONE-ETHINYL ESTRAD-LEVOMEFOLATE TAB 3-0.02-0.451 MG |
| pill | NDC | 52544029831 | DROSPIRENONE-ETHINYL ESTRAD-LEVOMEFOLATE TAB 3-0.02-0.451 MG |
| pill | NDC | 00378729753 | NORETHINDRONE & ETHINYL ESTRADIOL-FE CHEW TAB 0.4 MG-35 MCG  |
| pill | NDC | 68180087311 | NORETHINDRONE & ETHINYL ESTRADIOL-FE CHEW TAB 0.4 MG-35 MCG  |
| pill | NDC | 68180087313 | NORETHINDRONE & ETHINYL ESTRADIOL-FE CHEW TAB 0.4 MG-35 MCG  |

|       |           |             |                                                                                       |
|-------|-----------|-------------|---------------------------------------------------------------------------------------|
| pill  | NDC       | 00023586228 | NORETHINDRONE ACE-ETHINYL ESTRADIOL-FE CAP 1 MG-20 MCG (24)                           |
| pill  | NDC       | 00023586230 | NORETHINDRONE ACE-ETHINYL ESTRADIOL-FE CAP 1 MG-20 MCG (24)                           |
| pill  | NDC       | 51862001201 | NORETHINDRONE ACE & ETHINYL ESTRADIOL-FE TAB 1 MG-20                                  |
| pill  | NDC       | 51862001206 | NORETHINDRONE ACE & ETHINYL ESTRADIOL-FE TAB 1 MG-20                                  |
| pill  | NDC       | 51862029201 | NORETHINDRONE ACE & ETHINYL ESTRADIOL-FE TAB 1.5 MG-30                                |
| pill  | NDC       | 51862029206 | MICROGESTIN® FE 1.5/30 TABLETS 6X28                                                   |
| pill  | NDC       | 51862007206 | DESOGEST-ETH ESTRAD & ETH ESTRAD TAB 0.15-0.02/0.01 MG(21/5)                          |
| pill  | NDC       | 51862023803 | CAZIAN® TABLETS 3X28                                                                  |
| pill  | NDC       | 51862051006 | TRIVORA® TABLETS 6X28                                                                 |
| pill  | NDC       | 51862047006 | TRI-NORINYL® TABLETS 6X28                                                             |
| pill  | NDC       | 51862047106 | LEENA™ TABLETS 6X28                                                                   |
| pill  | NDC       | 63187075428 | NORGESTIMATE-ETH ESTRAD TAB 0.18-25/0.215-25/0.25-25 MG-MCG                           |
| pill  | NDC       | 68180083811 | NORGESTIMATE-ETH ESTRAD TAB 0.18-35/0.215-35/0.25-35 MG-MCG                           |
| pill  | NDC       | 68180083813 | NORGESTIMATE-ETH ESTRAD TAB 0.18-35/0.215-35/0.25-35 MG-MCG                           |
| pill  | NDC       | 51862028403 | TILIA FE TABLETS 3x28                                                                 |
| pill  | NDC       | 51862004591 | AMETHIA LO TABLETS 2X91                                                               |
| pill  | NDC       | 00378728490 | LEVONORG-ETH EST TAB 0.1-0.02MG(84) & ETH EST TAB 0.01MG(7)                           |
| pill  | NDC       | 51862004701 | AMETHIA                                                                               |
| pill  | NDC       | 51862004791 | AMETHIA TABLETS 2X91                                                                  |
| patch | ICD-10-CM | Z30016      | Encounter for initial prescription of transdermal patch hormonal contraceptive device |
| patch | ICD-10-CM | Z3045       | Encounter for surveillance of transdermal patch hormonal contraceptive device         |
| patch | HCPCS     | J7304       | Contraceptive supply, hormone containing patch, each                                  |
| patch | NDC       | 00062192001 | Ortho Evra                                                                            |
| patch | NDC       | 00062192015 | Ortho Evra                                                                            |
| patch | NDC       | 00062192024 | Ortho Evra                                                                            |
| patch | NDC       | 50458019201 | Ortho Evra                                                                            |
| patch | NDC       | 50458019215 | Ortho Evra                                                                            |
| patch | NDC       | 54569541300 | Ortho Evra                                                                            |
| patch | NDC       | 54868467000 | Ortho Evra                                                                            |
| patch | NDC       | 50458019224 | Ortho Evra                                                                            |
| patch | NDC       | 00378334053 | Xulane                                                                                |
| ring  | ICD-10-CM | Z30015      | Encounter for initial prescription of vaginal ring hormonal contraceptive             |
| ring  | ICD-10-CM | Z3044       | Encounter for surveillance of vaginal ring hormonal contraceptive device              |
| ring  | HCPCS     | J7303       | Contraceptive supply, hormone containing vaginal ring, each                           |
| ring  | NDC       | 00052027301 | NuvaRing                                                                              |
| ring  | NDC       | 00052027303 | NuvaRing                                                                              |
| ring  | NDC       | 54569586500 | NuvaRing                                                                              |
| ring  | NDC       | 54868483201 | NuvaRing                                                                              |
| ring  | NDC       | 55887075401 | NuvaRing                                                                              |
| ring  | NDC       | 54868483200 | NuvaRing                                                                              |
| ring  | NDC       | 00052027385 | NuvaRing                                                                              |
| ring  | NDC       | 76413013103 | NuvaRing                                                                              |
| ring  | NDC       | 65162046935 | EluRyng                                                                               |

Abbreviations: ICD-10-CM: International Classification of Diseases diagnostic code; ICD-10-PCS: International Classification of Diseases procedural code; CPT: Current Procedural Terminology procedural code; HCPCS: Healthcare Common Procedure Coding System procedural code within medical claims; NDC: National Drug Code; STI: Sexually-transmitted infection; IUD: intrauterine device.

| <b>eAppendix 2.</b> Adjusted odds ratios of utilization of women's preventive health services in July 2020 to December 2020 compared with July 2019 to December 2019                                                                                                                                                                                                                                                                                                                                                                                                                                                                                                                                                   |                                      |                                      |                                     |                                      |
|------------------------------------------------------------------------------------------------------------------------------------------------------------------------------------------------------------------------------------------------------------------------------------------------------------------------------------------------------------------------------------------------------------------------------------------------------------------------------------------------------------------------------------------------------------------------------------------------------------------------------------------------------------------------------------------------------------------------|--------------------------------------|--------------------------------------|-------------------------------------|--------------------------------------|
|                                                                                                                                                                                                                                                                                                                                                                                                                                                                                                                                                                                                                                                                                                                        | Breast cancer screening              | Cervical cancer screening            | STI testing                         | LARC insertion                       |
| N                                                                                                                                                                                                                                                                                                                                                                                                                                                                                                                                                                                                                                                                                                                      | 3,627,522                            | 5,344,555                            | 6,176,554                           | 3,147,123                            |
| Age range                                                                                                                                                                                                                                                                                                                                                                                                                                                                                                                                                                                                                                                                                                              | 40 to 74                             | 21 to 65                             | 18 to 74                            | 18 to 45                             |
| Odds ratio July - Dec 2020 relative to July to Dec 2019 (95% CI), p-value                                                                                                                                                                                                                                                                                                                                                                                                                                                                                                                                                                                                                                              | 1.081<br>(1.070,1.092),<br>p < 0.001 | 0.966<br>(0.954,0.979),<br>p < 0.001 | 0.94<br>(0.924,0.956),<br>p < 0.001 | 0.994<br>(0.946,1.044),<br>p = 0.804 |
| <p>Each model predicts the adjusted odds ratio that an enrolled woman in the given age range has a claim for a given service in July 2020 to December 2020 relative to July 2019 to December 2019. Additional covariates include calendar month fixed effects, county fixed effects, dependent status fixed effects (primary plan-holder, spouse, child, or other dependent), age group fixed effects, and three 2019 zip-code level covariates (per capita income, percent of population that is non-white, and percent of population that is not English proficient). Robust standard errors clustered at the individual level. STI: sexually transmitted infection; LARC: long-acting reversible contraception.</p> |                                      |                                      |                                     |                                      |
